# Supplementary material for: Coiled-Coil Protein Hydrogels Engineered with Minimized Fiber Diameters for Sustained Release of Doxorubicin in Triple-Negative Breast Cancer
Source: PubMed Central journal article supplement (PMC11094684; doi:10.1021/acsbiomaterials.4c00349), 2024-04-15
Supplement: ab4c00349_si_001.pdf [file ab4c00349_si_001.pdf]

# Supporting Information

## Coiled-coil protein hydrogels engineered with minimized fiber diameters for sustained release of doxorubicin in triple negative breast cancer

*Dustin Britton<sup>†</sup>, Jakub Legocki<sup>†</sup>, Deven Paul<sup>†</sup>, Olga Katsara<sup>¶</sup>, Orlando Aristizabal<sup>§,¶</sup>, Neelam Pandya<sup>§,¶</sup>, Orin Mishkit<sup>§,¶</sup>, Yingxin Xiao<sup>†</sup>, Matias Aristizabal<sup>§,¶</sup>, Neha Rahman<sup>§,¶</sup>, Robert Schneider<sup>¶,¶</sup>, Youssef Z. Wadghiri<sup>§,¶,\*</sup>, and Jin Kim Montclare<sup>†,¶,∇,°,\*</sup>*

<sup>†</sup> Department of Chemical and Biomolecular Engineering, New York University Tandon School of Engineering, Brooklyn, New York, 11201, USA

<sup>¶</sup> Department of Microbiology, New York University Grossman School of Medicine, New York, New York, 10016, USA

<sup>§</sup> Center for Advanced Imaging Innovation and Research (CAI<sup>2</sup>R), New York University Grossman School of Medicine, New York, New York, 10016, USA

<sup>¶</sup> Bernard and Irene Schwartz Center for Biomedical Imaging, Department of Radiology, New York University Grossman School of Medicine, New York, New York, 10016, USA

<sup>£</sup> Department of Biomedical Engineering, State University of New York Downstate Medical Center, Brooklyn, New York, 11203, USA

<sup>¥</sup> College of Medicine, State University of New York Downstate Medical Center, Brooklyn, New York, 11203, USA

<sup>#</sup> Department of Radiation Oncology, New York University Grossman School of Medicine, New York, New York, 10016, USA

<sup>∇</sup> Department of Chemistry, New York University, New York, New York, 10012, USA

<sup>°</sup> Department of Biomaterials, New York University College of Dentistry, New York, New York, 10010, USA

\* Corresponding authors

Email: [montclare@nyu.edu](mailto:montclare@nyu.edu) and [Youssef.zaimwadghiri@nyulangone.org](mailto:Youssef.zaimwadghiri@nyulangone.org)

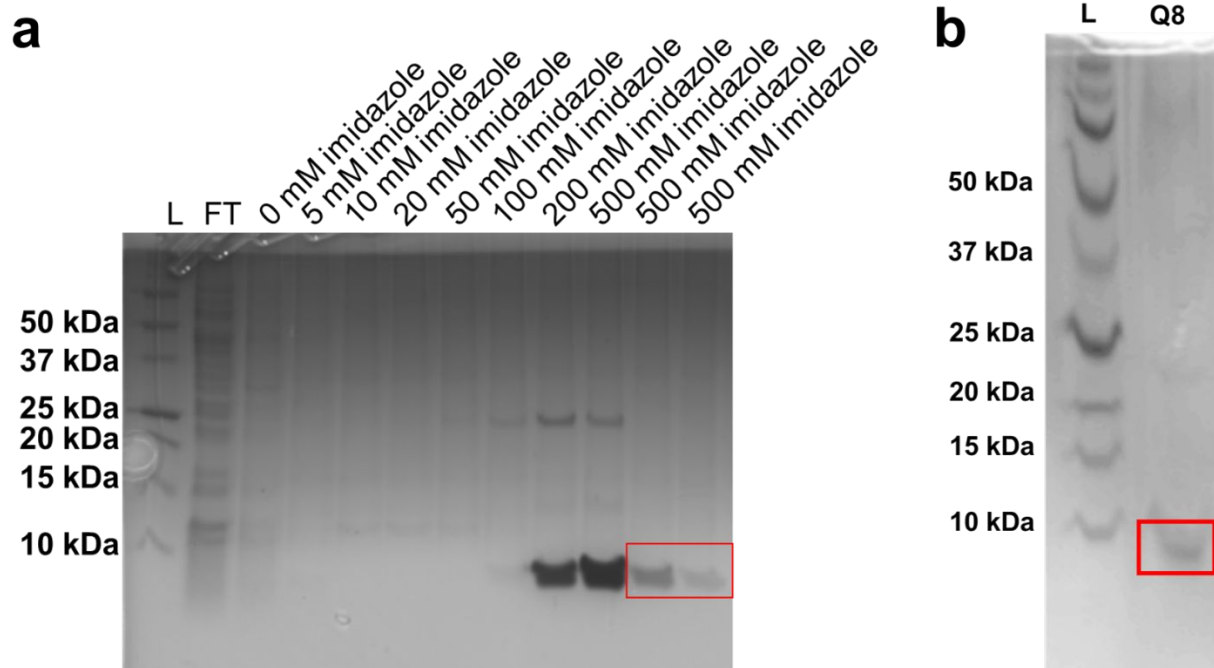

**Figure S1 a.** 12% SDS-PAGE of Q8 purification using cobalt-charged NiNTA affinity chromatography. L: Ladder, FT: flow-through. **b.** 12% SDS-PAGE of Q8 at 1  $\mu$ M following dialysis and concentration.

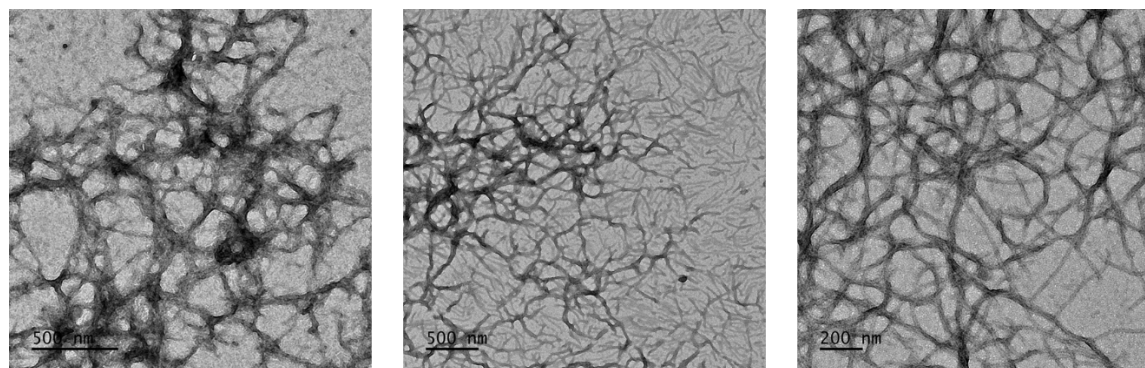

**Figure S2** Various transmission electron micrographs of Q8.

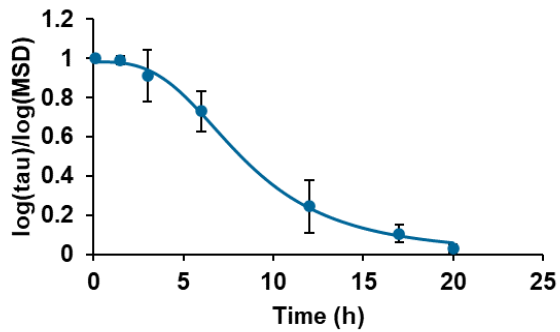

**Figure S3** Sigmoidal fit of exponents from MPT analysis of Q8 microrheological assay. Error bars represent the standard deviation of three independent trials.

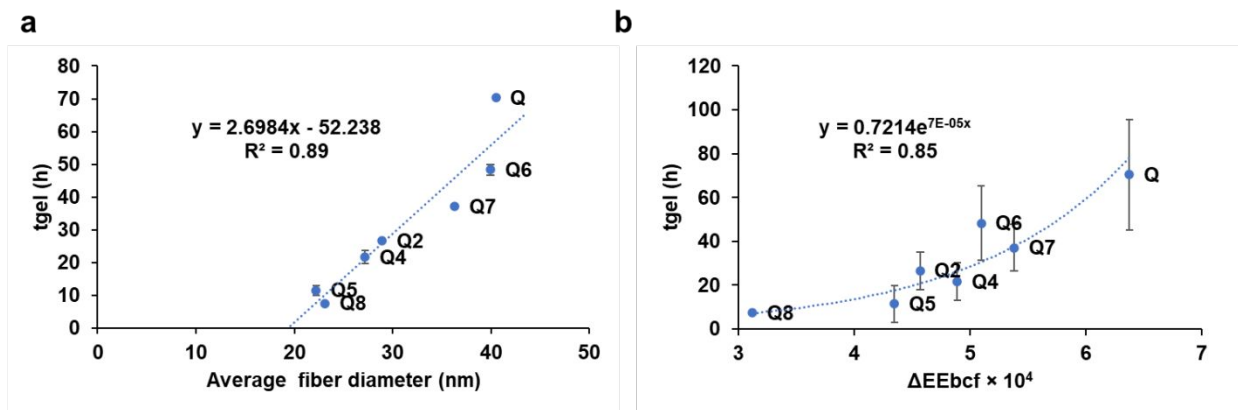

**Figure S4 a.** Updated linear regression model for relationship between average fiber diameter and critical gelation time ( $t_{gel}$ ) for all gelling Q variants. Error represents the average of three independent trials. **b.** Exponential relationship between  $\Delta EE_{bcf}$  and critical gelation time ( $t_{gel}$ ) for *in silico* prediction. Error bars represent the standard deviation of three independent trials.

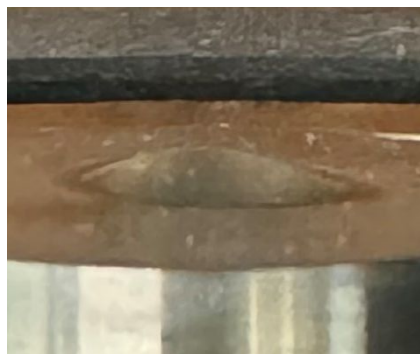

**Figure S5** Representative image of Q in the gel state (2 mM) after loading onto parallel plate rheometer.

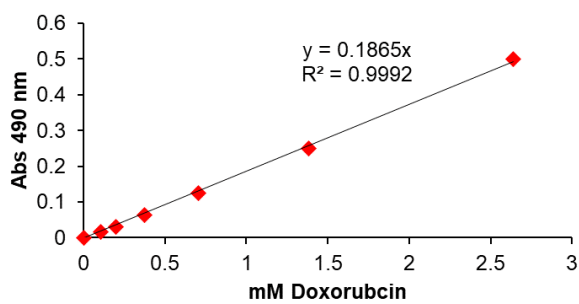

**Figure S6** Standard curve of absorbance at 490 nm by a microplate reader (BioTek) for doxorubicin concentration.

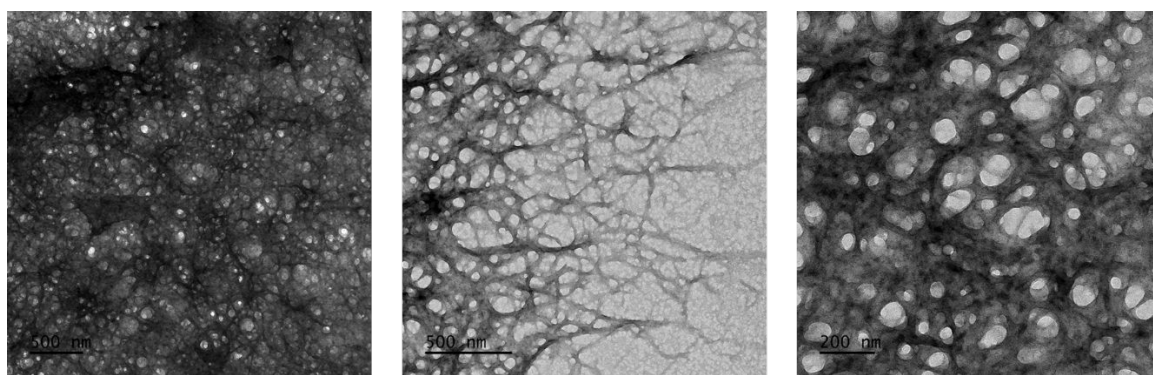

**Figure S7** Various transmission electron micrographs of Q8•Dox.

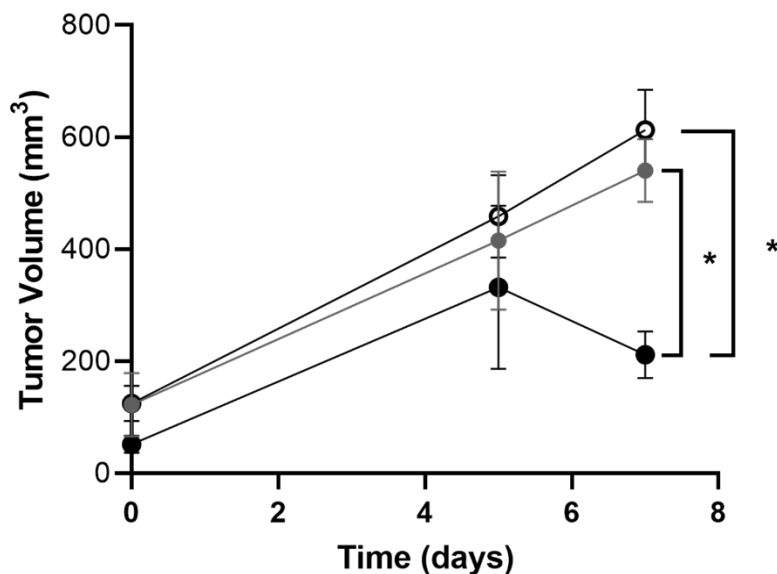

**Figure S8** Average tumor volume following treatment of Q8 (open circles), Dox (grey filled circles), and Q8•Dox (black filled circles) measured at baseline (0 days), 5 days, and 7 days post-treatment. Error bars represent the standard error of the mean: 5 mice for Q8•Dox and Dox, 4 mice for Q8. \* represents p-value < 0.05 calculated by 2-way ANOVA.

**Table S1** Average and standard deviation of MRE values of CD spectra  $\alpha$ -helical minima and % secondary structure content assessed by peak deconvolution of ATR-FTIR spectra

| Phase    | Circular Dichroism Minima                                     |                                                               |                               | FTIR Deconvolution (%) |                |             |
|----------|---------------------------------------------------------------|---------------------------------------------------------------|-------------------------------|------------------------|----------------|-------------|
|          | $-\Theta_{208}$<br>(deg·cm <sup>2</sup> ·dmol <sup>-1</sup> ) | $-\Theta_{222}$<br>(deg·cm <sup>2</sup> ·dmol <sup>-1</sup> ) | $\Theta_{222} / \Theta_{208}$ | $\alpha$ -helix        | $\beta$ -sheet | Random Coil |
| Solution | 27,000 ± 2,000                                                | 33,000 ± 3,000                                                | 1.2 ± 0.1                     | 28.8 ± 4.2             | 41.9 ± 5.8     | 25.9 ± 6.8  |
| Gel      | 8,000 ± 2,000                                                 | 9,000 ± 1,000                                                 | 1.1 ± 0.0                     | 34.7 ± 2.0             | 39.9 ± 6.7     | 26.5 ± 9.0  |

**Table S2** Comparison of experimental and predicted values of  $\alpha$ -helicity (gel state) and increase in structured content measured by FTIR using univariate linear regression models from Britton *et al.*<sup>1</sup>

| Structure metric                                          | Actual | Predicted from Model | Residual | RMSE from model |
|-----------------------------------------------------------|--------|----------------------|----------|-----------------|
| $\alpha$ -helicity (gel) – univariate with Rosetta Score  | 34.7   | 41.6                 | 6.9      | 1.0             |
| Increase in Structure (%) – univariate with Rosetta Score | 5.9    | 5.6                  | 0.3      | 1.0             |

## Supporting Information References

(1) Britton, D.; Christians, L. F.; Liu, C.; Legocki, J.; Xiao, Y.; Meleties, M.; Yang, L.; Cammer, M.; Jia, S.; Zhang, Z.; et al. Computational Prediction of Coiled–Coil Protein Gelation Dynamics and Structure. *Biomacromolecules* **2024**, *25* (1), 258-271. DOI: 10.1021/acs.biomac.3c00968
